# Supplementary material
Source: publisher figshare collection journal article supplement (https://acs.figshare.com/ndownloader/files/24205082)
Supplement: Supplementary file 1 [file 24205082]

## Supporting Information

### Complex pattern formation in solutions of protein and mixed salts using dehydrating sessile droplets

Binita Pathak<sup>1</sup>, John Christy<sup>2\*</sup>, Khellil Sefiane<sup>2,4</sup> and Devrim Gozuacik<sup>3</sup>

<sup>1</sup>Department of Mechanical Engineering, Indian Institute of Technology, BHU, Varanasi-221005, India

<sup>2</sup>School of Engineering, The University of Edinburgh, Kings Buildings, Edinburgh EH9 3JL, United Kingdom

<sup>3</sup>Koç University, School of Medicine, KUTTAM Research Center for Translational Medicine, Topkapı-Zeytinburnu 34010 Istanbul, Turkey

<sup>4</sup>Tianjin Key Lab of Refrigeration Technology, Tianjin University of Commerce, Tianjin City 300134, PR China

\*Corresponding Author: [J.Christy@ed.ac.uk](mailto:J.Christy@ed.ac.uk) . Phone: +44(0) 131 6504854

### Table of Contents

|                                                                  |   |
|------------------------------------------------------------------|---|
| Figure S1. Final deposit of BSA droplets.....                    | 2 |
| Figure S2. Comparison of the net DLVO forces.....                | 2 |
| Figure S3. Temporal variation of different forces.....           | 3 |
| Figure S4. Variation of DLVO forces with salt concentration..... | 3 |
| Figure S5. Temporal variation of droplet volume .....            | 4 |
| Figure S6. Final deposit of KCl crystals .....                   | 5 |
| Figure S7: Estimation of $l_{\text{crys}}$ .....                 | 5 |

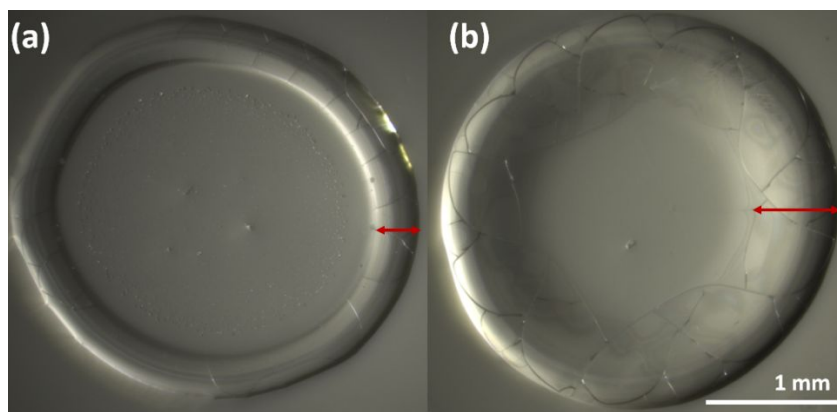

**Figure S1. Final deposit of BSA droplets.** We show the final deposit of droplets with an initial concentration of (a) 3% wt. BSA and (b) 7% wt. BSA in water.

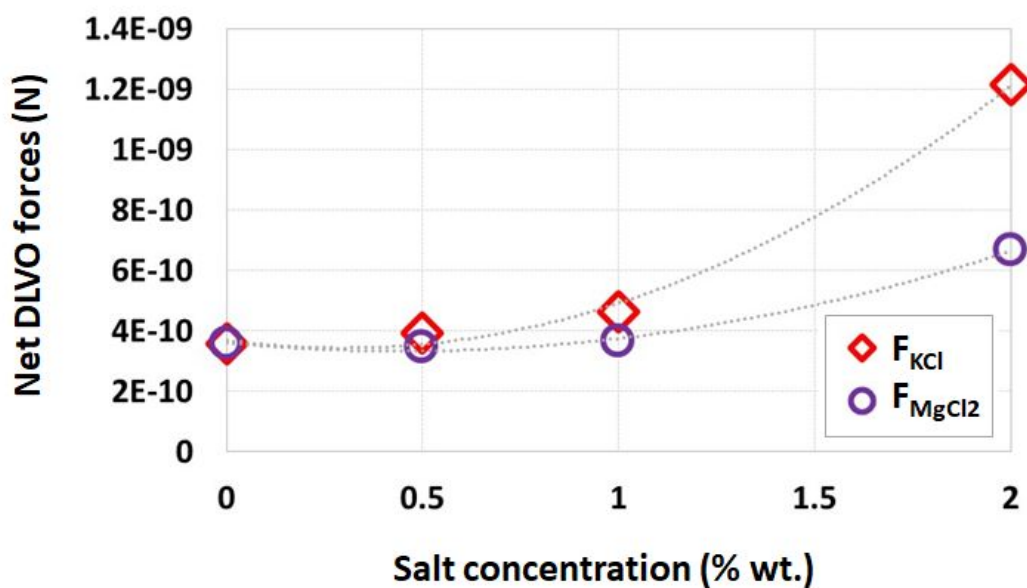

**Figure S2. Comparison of the net DLVO forces.** The net DLVO forces (magnitude) acting between particle-particle are plotted with the increase in the salt concentration (for BSA+KCl and BSA+MgCl<sub>2</sub> droplets; BSA: 7% wt.) [ $F_{KCl}$  and  $F_{MgCl2}$  are the net forces for KCl and MgCl<sub>2</sub> respectively]

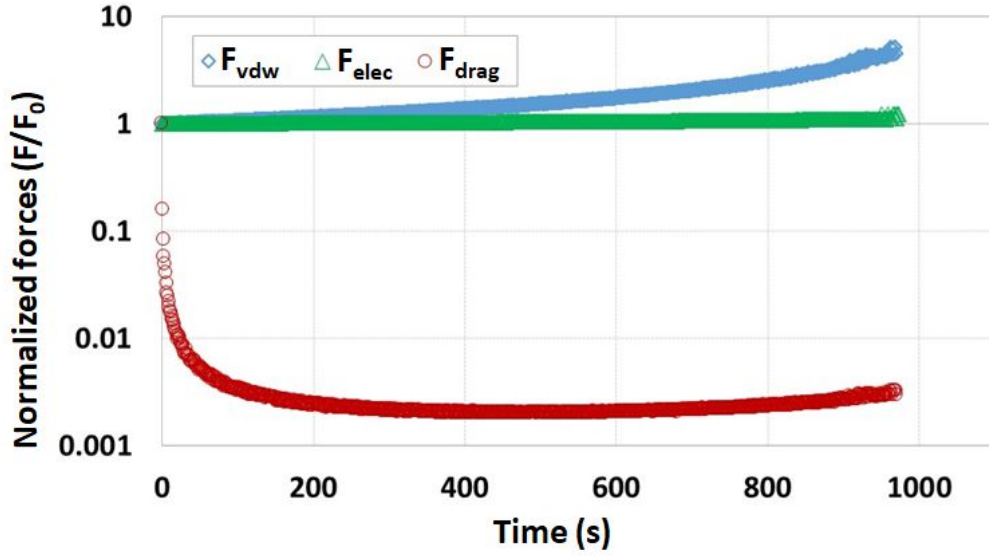

$F_{\text{drag}}$ : drag force

$F_{\text{vdw}}$ : van der Waals forces between protein-protein

$F_{\text{elec}}$ : electrostatic interaction forces between protein-protein

**Figure S3. Temporal variation of different forces.** The temporal variation of different forces are plotted for droplets of 1% wt. BSA + 2% wt. KCl salt [the forces are normalized with the forces at the initial state of the droplet ( $F_0$ : forces at time= 0)].

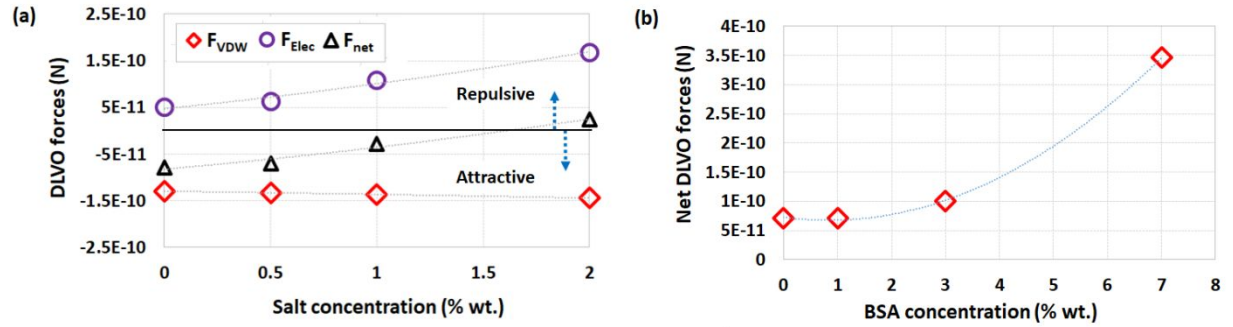

**Figure S4. Variation of DLVO forces with salt concentration.** The plot shows the variation of (a) DLVO forces for  $\text{MgCl}_2$ +BSA droplets with salt concentration for (BSA: 1% wt.) and (b) net DLVO forces ( $F_{\text{net}}=F_{\text{VDW}}+F_{\text{Elec}}$ ) (only magnitude) with variation in the BSA concentration ( $\text{MgCl}_2$ : 0.5% wt.)

[van der Waals attraction:  $F_{\text{VDW}} = \frac{-A}{6D^2} \frac{r_1 r_2}{(r_1 + r_2)}$  and electrostatic repulsion forces:  $F_{\text{Elec}} = \kappa Z e^{-\kappa D}$  respectively]

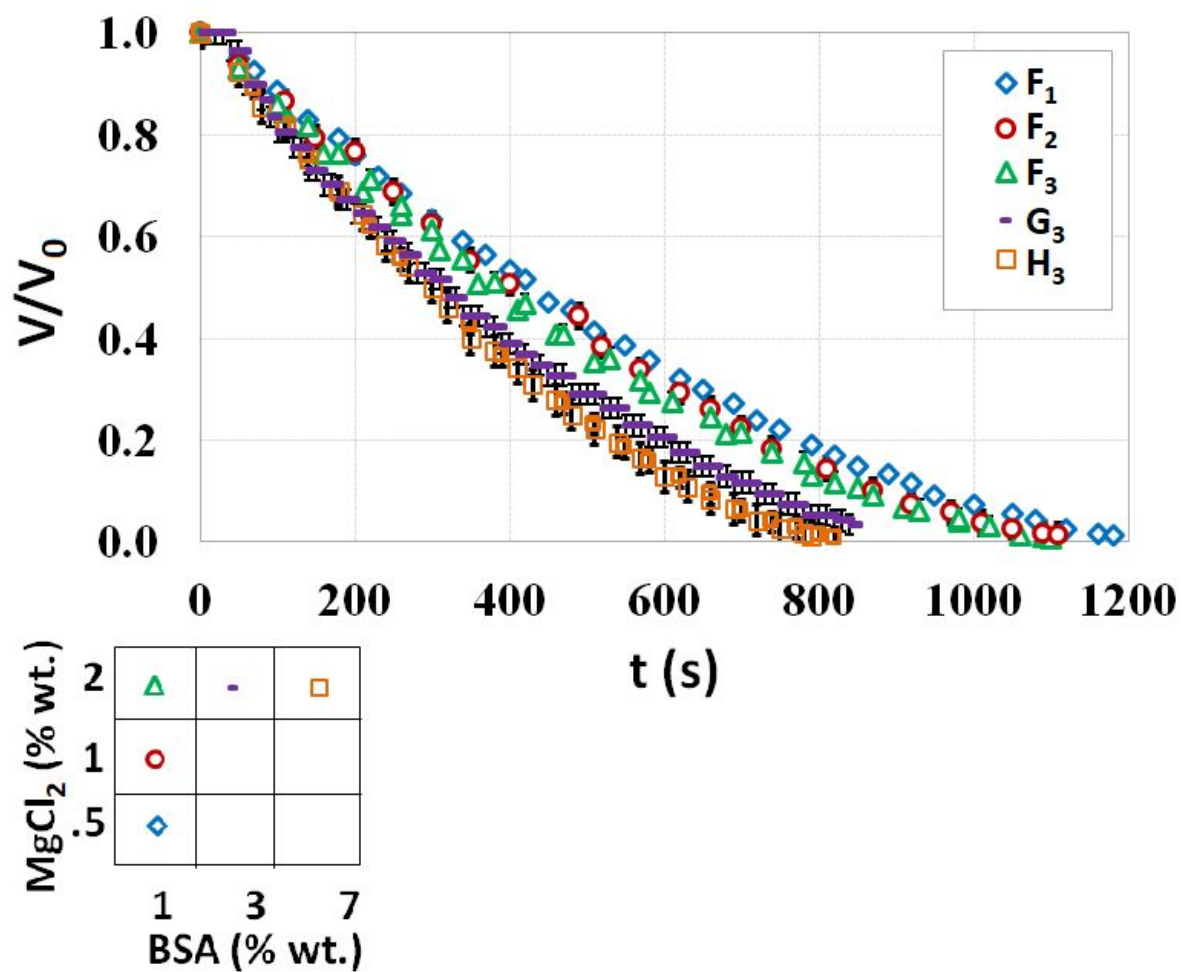

**Figure S5. Temporal variation of droplet volume.** The temporal variation of the volume of BSA+MgCl<sub>2</sub> droplets are plotted in the Figure. The volume is non-dimensionalized with the initial droplet volume

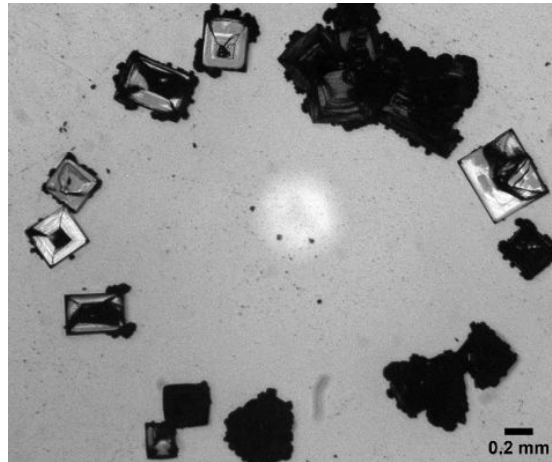

**Figure S6. Final deposit of KCl crystals.** The final precipitate shows the formation of ring-type peripheral deposit of KCl crystals ( the initial concentration is 1 M solution in water) [unpublished data with permission from Efstratiou et. al].

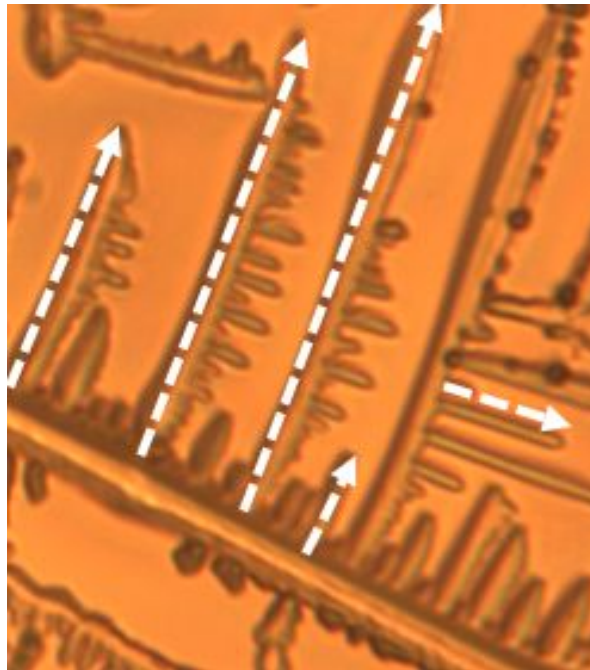

**Figure S7: Estimation of  $l_{\text{crys}}$ .** The  $l_{\text{crys}}$  is the axial length of the crystals measured from the point of initiation to the final growth (full grown crystal). The  $l_{\text{crys}}$  is calculated from the point of its initiation to the tip (maximum growth) for the main crystal as well as the branches.
